# Supplementary material for: CSE1L interaction with MSH6 promotes osteosarcoma progression and predicts poor patient survival
Source: PubMed Central journal article supplement (PMC5384328; doi:10.1038/srep46238), 2017-04-07
Supplement: srep46238-s1.pdf [file srep46238-s1.pdf]

CSE1L interaction with MSH6 promotes osteosarcoma progression and predicts poor  
patient survival

Dong-dong Cheng<sup>1#</sup>, He-chun Lin<sup>2#</sup>, Shi-jie Li<sup>1</sup>, Ming Yao<sup>2</sup>, Qing-cheng Yang<sup>1\*</sup>,  
Cun-yi Fan<sup>1\*</sup>

1. Department of Orthopedics, Shanghai Jiao Tong University Affiliated Sixth  
People's Hospital, Shanghai, 200233, China.

2. State Key Laboratory of Oncogenes and Related Genes, Shanghai Cancer Institute,  
Renji Hospital, Shanghai Jiao Tong University School of Medicine, Shanghai, 200032,  
China.

## **Methods:**

### **Cell apoptosis assay**

Forty-eight hours after transfection, the fluorescein isothiocyanate Annexin V Apoptosis Detection kit I (BD Pharmingen, San Diego, CA, USA) was used. Briefly, the cells were collected and centrifuged at  $2000 \times g$  for 5 min. Then the cells resuspended in 500  $\mu$ l binding buffer, supplemented with 5  $\mu$ l Annexin V and 5  $\mu$ l propidium iodide (PI), for 15 min of dark treatment at the room temperature. The flow cytometry (FC500 MPL, Beckman Coulter, Brea, CA, USA) was used to analyze the samples.

### **In Vitro Migration and Invasion Assays**

Cell migration and invasion assays were performed in a 24-well plate with 8-mm pore size chamber inserts (Corning, New York, NY, USA). For migration assays, after transfection with either si-NC or si-CSE1L, cells ( $5 \times 10^4$  cells/well) were transferred into the upper chamber of an uncoated membrane. For invasion assays, after transfection, cells ( $1 \times 10^5$  cells/well) were transferred into the upper chamber of a Matrigel-coated membrane. Cells were diluted using serum-free culture medium. In both assays, cells seeded into the upper chamber were suspended in 200  $\mu$ l Dulbecco's modified Eagle's Medium (DMEM) without fetal bovine serum (FBS). The lower chambers contained 800  $\mu$ L of DMEM with 10% FBS. Cells were incubated at 37 °C in 5% CO<sub>2</sub> for 12 h and 16 h for the migration and invasion assays, respectively. The membrane inserts were removed, and non-invading cells were removed from the upper surface of the membrane. Cells that had migrated to the

bottom of the chamber were fixed with 100% methanol for 30 min and stained with 0.1% crystal violet for 30 min. Finally, cells from a minimum of 10 random fields were imaged and counted using a CKX41 inverted microscope (Olympus, Tokyo, Japan). All assays were independently performed three times.

**Supplementary Figures and supplementary Figure legends:**

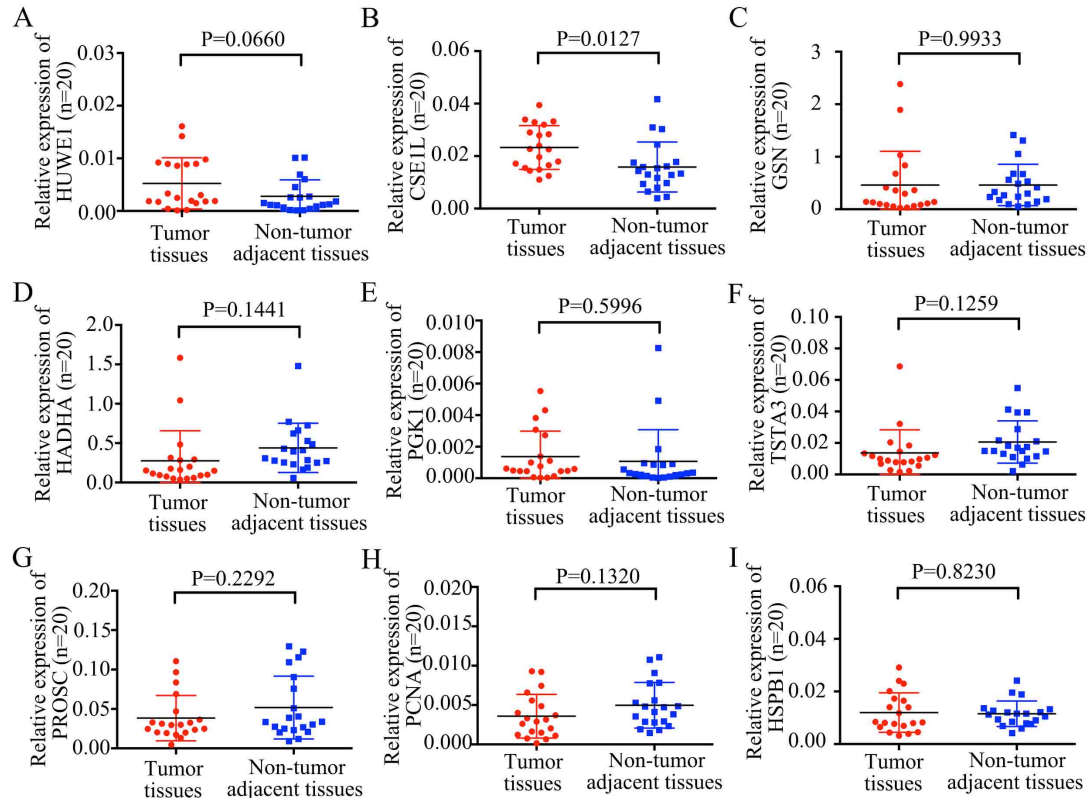

**Supplementary Figure S1:** The expression of these 9 upregulated proteins was measured using qRT-PCR in 20 human tissue sample pairs in which each pair consisted of an osteosarcoma sample and a corresponding non-tumor tissue sample.

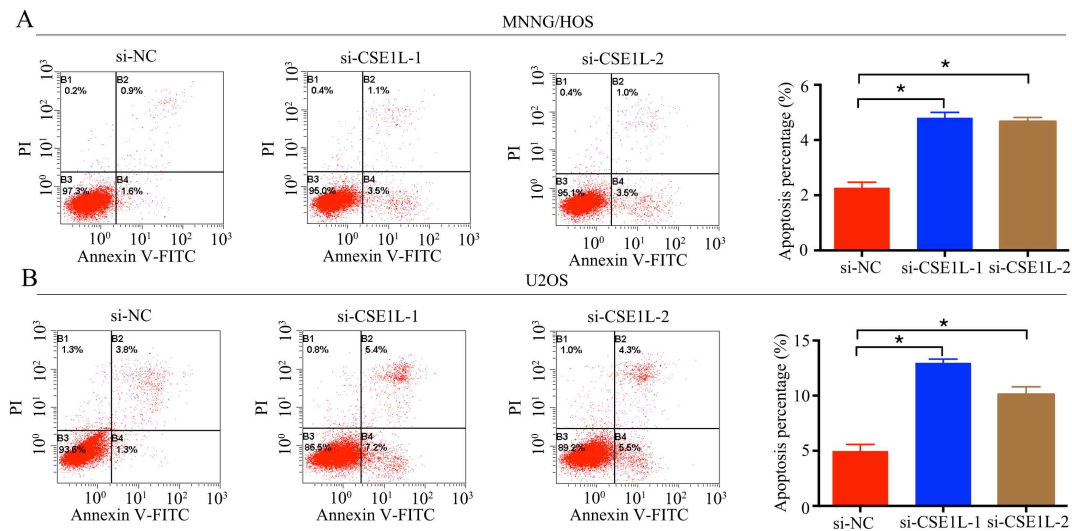

**Supplementary Figure S2:** Cell apoptosis assays were used to detect the cell

apoptosis after transfection with si-CSE1L in MNNG/HOS and U2OS cell lines.

Statistical analysis was performed using Student's *t* test (n = 3). \* *P*<0.05.

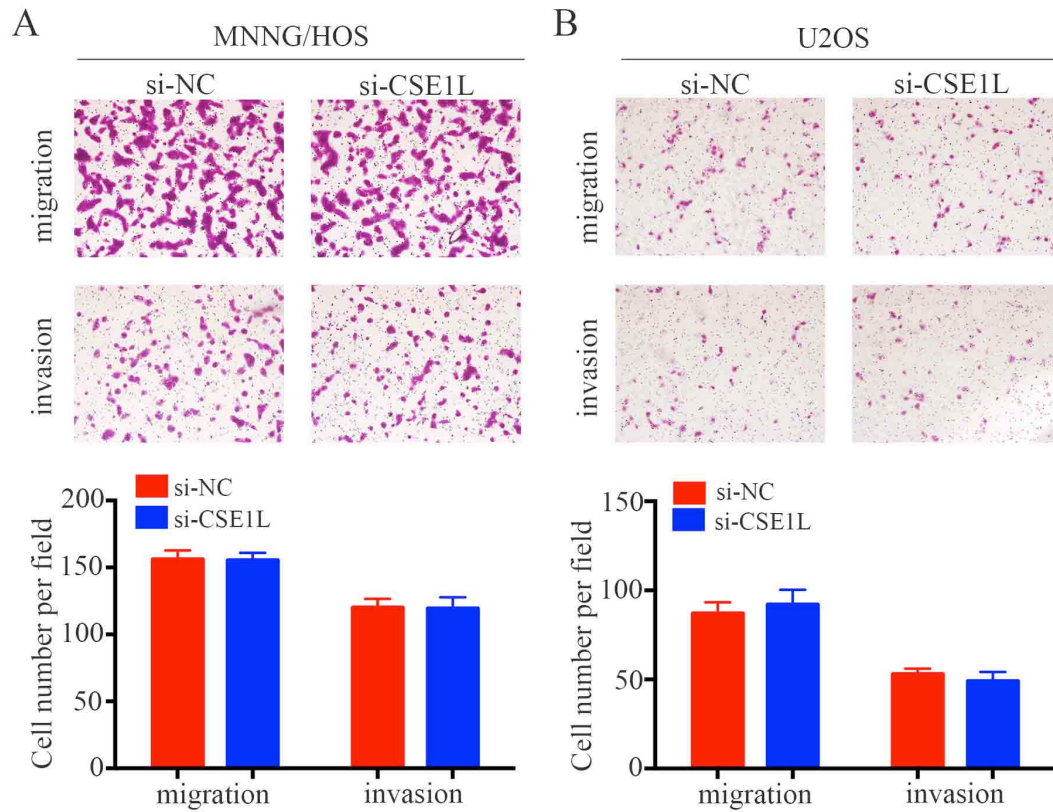

**Supplementary Figure S3:** Transwell assays were used to detect the migration and invasion capability of each cell line after transfection with si-CSE1L. The upper panels show representative photos (magnification: 100×) of invasive cells, and the lower panel shows histograms of the results. Statistical analysis was performed using Student's *t* test (n = 3).

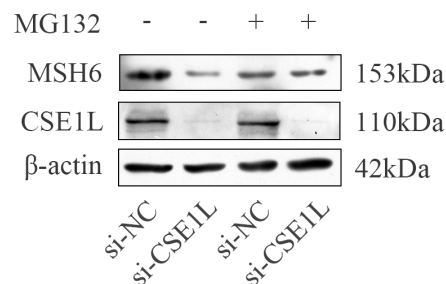

**Supplementary Figure S4:** CSE1L affected MSH6 protein stability via the proteasome pathway. Representative blots displaying protein expression of MSH6 treated with MG132 (100  $\mu\text{mol/L}$ ) or DMSO as a control for 12 h after transfection with si-NC or si-CSE1L.  $\beta$ -actin was used as an internal control.

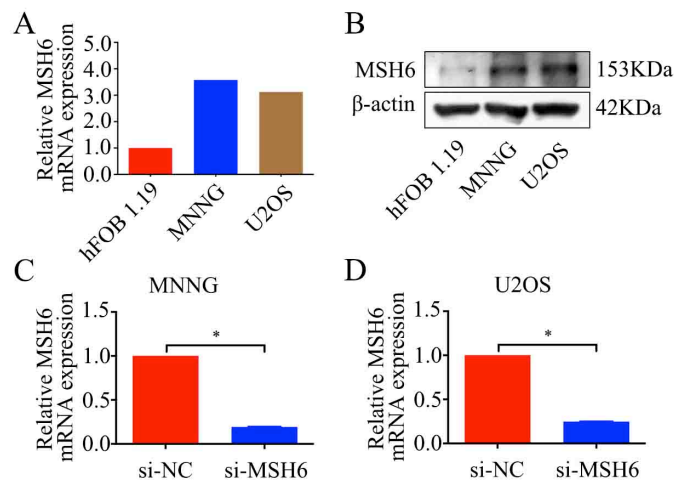

**Supplementary Figure S5:** (A) (B) The mRNA and protein expressions of MSH6 in osteosarcoma cells and osteoblastic cells were detected by qRT-PCR and western blotting. (B) The mRNA expression of MSH6 was detected after transfection with si-MSH6 in MNNG/HOS and U2OS cells. \*  $P < 0.05$  by Student's  $t$  test.

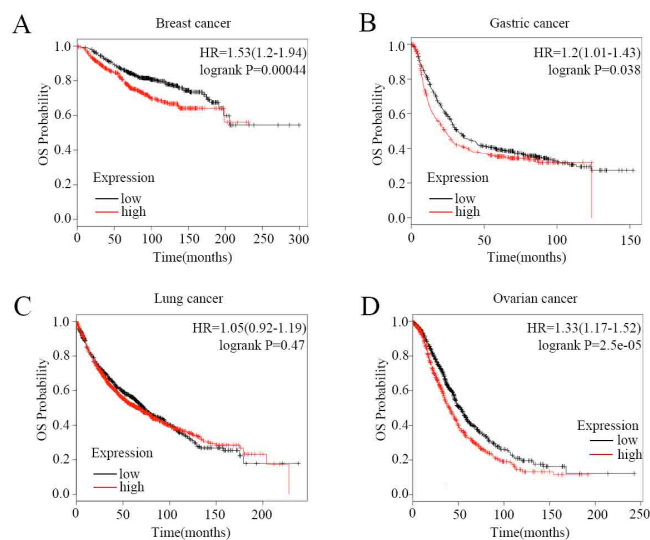

**Supplementary Figure S6:** Kaplan-Meier survival analyses were performed using

microarray data (<http://www.kmplot.com>) in breast cancer, lung cancer, gastric cancer and ovarian cancer patients.

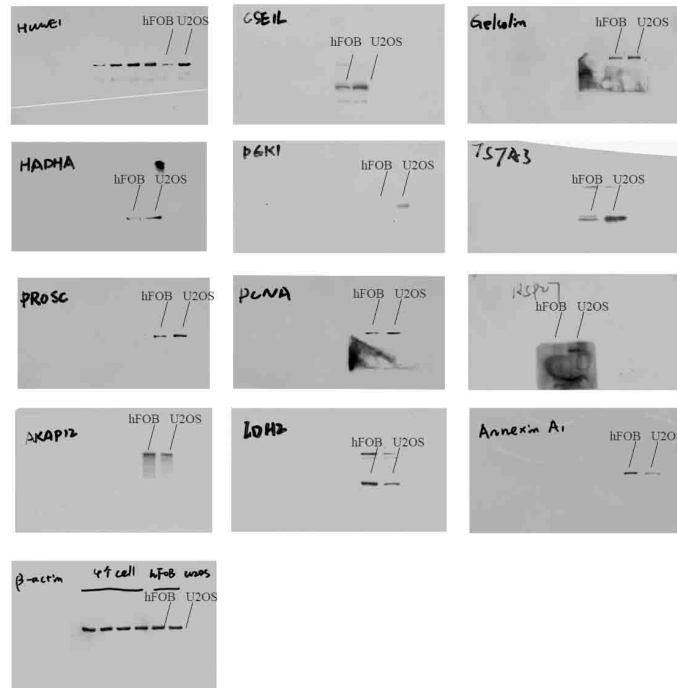

**Supplementary Figure S7: Full-length gels for Figure 1**

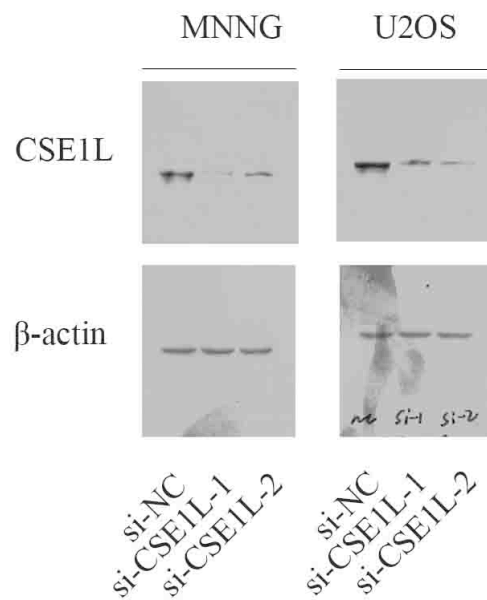

**Supplementary Figure S8: Full-length gels for Figure 2**

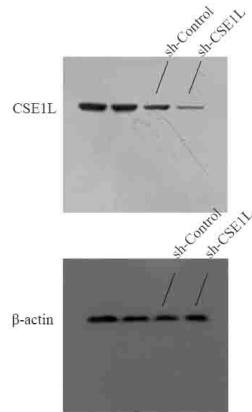

**Supplementary Figure S9: Full-length gels for Figure 3**

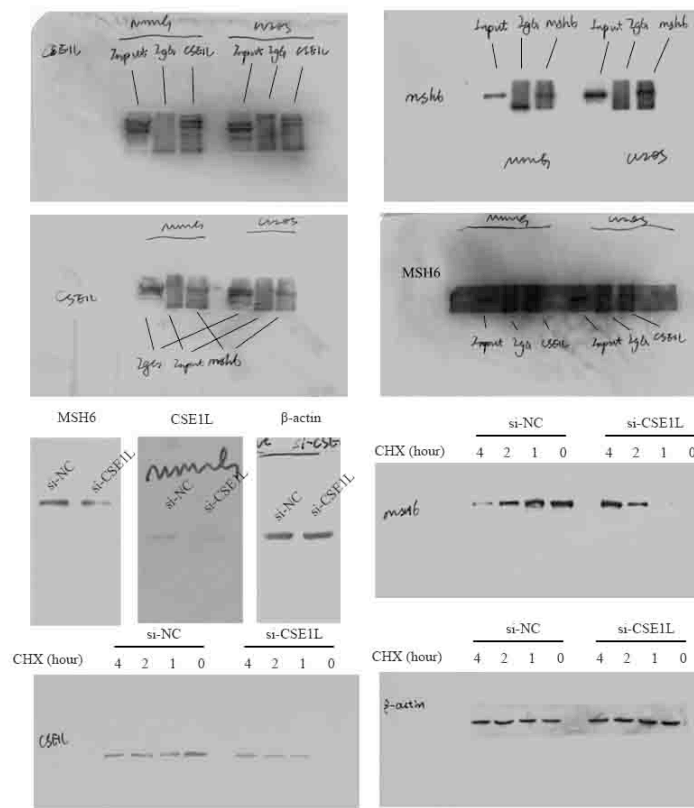

**Supplementary Figure S10: Full-length gels for Figure 4**

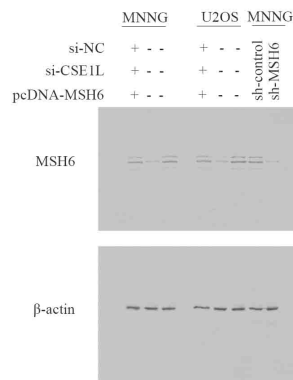



**Supplementary Figure S11: Full-length gels for Figure 5**

**Supplementary Table S1** The primer sequences for qRT-PCR

| Gene name |         | Sequence (5'→3')        |
|-----------|---------|-------------------------|
| GSN       | Forward | ATGGAGACTTCTTCACGGGC    |
|           | Reverse | CACTCATTGCCAGCCAGTA     |
| ANXA1     | Forward | AATCAGAAGCCCAAGTCTCCA   |
|           | Reverse | GGATGACTTCACAGTTTGAACAT |
| PROSC     | Forward | CACCAGCGGAGAAGAGAGTAA   |
|           | Reverse | TCCTATGGTCATCAGCCCCA    |
| IDH2      | Forward | ACAACACCGACGAGTCCATC    |
|           | Reverse | GCCCATCGTAGGCTTTCAGT    |
| CSE1L     | Forward | GCAGCTCATGCTCTTGAACG    |
|           | Reverse | GCCAGGAAGTGTGAGAGCTT    |
| AKAP12    | Forward | GCTGGACAGGAAACGGAGAA    |
|           | Reverse | CACTGCGGTTGACTCTGACT    |
| HUWE1     | Forward | ACTGGTGCAACTTCCTCCTT    |
|           | Reverse | TTGTCCTGGGCTGCAATCTC    |
| PCNA      | Forward | TGAAGCACCAAACCAGGAGA    |
|           | Reverse | GTGCAAATTCACCAGAAGGCA   |
| HADHA     | Forward | AGACCTGAGAAGGTGATTGGC   |
|           | Reverse | GCGCAAGACACCTGGTAGTA    |
| ACOT1     | Forward | GCTGCTGTGCCGGGTG        |
|           | Reverse | CCCAGGTTCTGGCGGC        |
| MTHFD1    | Forward | ATGACCTCAAGCTCCCAGTTG   |
|           | Reverse | GCTTTGTGTTGAGCTTCGGG    |
| KTN1      | Forward | GTGAGCAGATGGAGGCAGAG    |
|           | Reverse | AGTTCTGCAGACTGCTTGCT    |
| TSTA3     | Forward | GGATGCTCCGTGCAACTG      |
|           | Reverse | GTGTGTGGGTTGGACCTTCT    |
| PGK1      | Forward | TGTAGGCCCAGAAGTGGAGA    |
|           | Reverse | CTGGCTCGGCTTTAACCTTG    |

|        |         |                         |
|--------|---------|-------------------------|
| HSPB1  | Forward | CGCGGAAATACACGCTGC      |
|        | Reverse | CGGATTTTGCAGCTTCTGGG    |
| MPST   | Forward | CCGAGACGGCATTGAACCT     |
|        | Reverse | CTGAGATGACATCCTCGGGC    |
| DARS   | Forward | TCTCGCGATCTTTCTGGAGC    |
|        | Reverse | CCAAAACCTCGATTTCCGCCG   |
| MCM5   | Forward | TCACCAAGCAGAAATACCCG    |
|        | Reverse | CGACTCACTTGAGGCGGTAG    |
| LMNA   | Forward | GCAGCATCATAACAAGAGATGGG |
|        | Reverse | CCTCCAGTGACTGCACAGAG    |
| MACF1  | Forward | AGACAAGTGGCTCAGTGCAA    |
|        | Reverse | GTTCTACCTCGTGCTCGGC     |
| CDK14  | Forward | GCTCGCCTCCCTAGACCT      |
|        | Reverse | TCTTCAAAGCAATGCGACTGA   |
| BICD2  | Forward | GCCACCAGGTGTGACGAGTA    |
|        | Reverse | TGTGACTTACGCTCGGTGTG    |
| RAMP2  | Forward | CTGTCCTGAATCCCCACGAG    |
|        | Reverse | CAGGGTGCTATAAGGCCTGC    |
| ZNF845 | Forward | GGATGGCTCTTTCTCAGGGTC   |
|        | Reverse | CCAGGGAGACCAGGTTCCCTA   |
| GNG7   | Forward | GAGTGTCGGCCCCGC         |
|        | Reverse | AGCTTGCTGTACACCCTGTG    |
| KRCC1  | Forward | GCGGGGGACAGTAGTTGTAG    |
|        | Reverse | AACTGGTGAGCTCATAATGCAA  |
| CASP7  | Forward | GTGGGAACGATGGCAGATGA    |
|        | Reverse | TTCCGTTTCGAACGCCATA     |
| CHRNA1 | Forward | TCTCCTCCTGCTCTTTAGCCT   |
|        | Reverse | CCCATTGCTGTTTCAGACGC    |
| SRGN   | Forward | ACTTCACGAGCTTGGCTCAG    |
|        | Reverse | TCTCCGCGTAGGATAACCTTG   |
| CD82   | Forward | GGCTGCTGAAGCAGGAGAT     |
|        | Reverse | CAGCACTTCACCTGAGCCTG    |
| HPCAL1 | Forward | CTGTGTTCCGGGGCTGTCTGT   |

|                |         |                         |
|----------------|---------|-------------------------|
|                | Reverse | GCGGCGACTACACCAGAG      |
|                | Forward | GACCTCAGTTGTTCCAGGGT    |
| RAET1E         | Reverse | CTGTTGTACATGATCTCCAAGGC |
|                | Forward | TGTTCAGCCCATCCTGTGTC    |
| PGF            | Reverse | AGCATCGCCGCACCTTTC      |
|                | Forward | CCCTCCAACCCCGGAAACTT    |
| CSF2           | Reverse | GCCATGCCTGTATCAGGGTC    |
|                | Forward | ACACTTCTCAGGGCCAAGTG    |
| STRA6          | Reverse | CTGGCCCTTCTCCTCCAATC    |
|                | Forward | CCTGTTCTAATGGTGCCAAGTG  |
| DLL1           | Reverse | CACTCGCACACATAGCGGTG    |
|                | Forward | GGGATACAGCCTTTGACC      |
| MSH6           | Reverse | GTTTACAGCCCTTCTTGG      |
|                | Forward | TTGTTACAGGAAGTCCCTTGCC  |
| $\beta$ -actin | Reverse | ATGCTATCACCTCCCCTGTGTG  |

**Supplementary Table S2** The primary antibody for Western blotting

| Protein name   | Dilution ratio | Reagent brand             |
|----------------|----------------|---------------------------|
| HUWE1          | 1:500          | Bioworld Technology       |
| CSE1L          | 1:500          | Proteintech               |
| GSN            | 1:1000         | Cell Signaling Technology |
| HADHA          | 1:200          | Santa Cruz                |
| PGK1           | 1:500          | Proteintech               |
| TSTA3          | 1:500          | Proteintech               |
| PROSC          | 1:1000         | GeneTex                   |
| PCNA           | 1:1000         | Proteintech               |
| HSPB1          | 1:500          | Proteintech               |
| AKAP12         | 1:500          | Proteintech               |
| IDH2           | 1:1000         | Epitomics                 |
| ANXA1          | 1:500          | Proteintech               |
| MSH6           | 1:200          | Abcam                     |
| $\beta$ -actin | 1:20000        | Sigma-Aldrich             |
